# Supplementary material for: Diagnostic nomogram for gallbladder wall thickening mimicking malignancy: using contrast-enhanced ultrasonography or multi-detector computed tomography?
Source: Springer Nature journal article supplement (doi:10.1007/s00261-017-1162-z), 2017-04-26
Supplement: MOESM1 [file 12249522]

**Supplementary Table 1.** Inter-observer Variability among Two Operators

| Parameter | Interclass Correlation Coefficient |
| --- | --- |
| Time to commencement of enhanced | 0.807 (0.221, 0.952) |
| Washout time | 0.935 (0.712, 0.985) |
| Duration of enhancement | 0.936 (0.714, 0.986) |
| Vascularity | 0.899 (0.593, 0.975) |
| Early enhancement of adjacent liver | 1.000 |
| Invasion of adjacent liver | 0.899 (0.593, 0.975) |
| Enhancement level in arterial phase | 0.938 (0.750, 0.985) |
| Enhancement patterns in arterial phase | 0.927 (0.707, 0.982) |
| Enhancement level in late phase | 1.000 |
| Interrupted inner layer | 0.737 (0.0595, 0.935) |
| Interrupted outer layer | 0.750 (0.0065, 0.938) |

Note—Numbers in parentheses are 95% confidence intervals.
